# Supplementary material for: Characteristics and outcomes of pediatric patients presenting at Cambodian referral hospitals without appointments: an observational study
Source: Springer Nature journal article supplement (doi:10.1186/s12245-018-0172-0), 2018-03-13
Supplement: MOESM1 [file 15531372]

## Chief Complaints

| Top 15 Chief Complaints | Code |
|-------------------------|------|
| Abdominal pain          | 101  |
| Chest pain              | 102  |
| Diarrhea                | 103  |
| Dizziness/vertigo       | 104  |
| Fall                    | 105  |
| Fever                   | 106  |
| Genito-urinary problem  | 107  |
| Headache                | 108  |
| Laceration              | 109  |
| Orthopedic injury       | 110  |
| Respiratory problems    | 111  |
| Traumatic injury        | 112  |
| Skin complaint/trauma   | 113  |
| Vaginal bleeding        | 114  |
| Vomiting                | 115  |

| A-E                            | Code |
|--------------------------------|------|
| Abdominal problems             | 116  |
| Abnormal behavior              | 117  |
| Abuse                          | 118  |
| Alcohol related                | 119  |
| Allergic reaction/ Anaphylaxis | 120  |
| Altered mental status          | 121  |
| Assult                         | 122  |
| Back pain                      | 123  |
| Bites                          | 124  |
| Blast injury/explosion         | 125  |
| Body aches                     | 126  |
| Burns                          | 127  |
| Cardiac arrest                 | 128  |
| Cardiovascular complaint       | 129  |
| Crying/irritability            | 130  |
| Convulsions/seizures           | 131  |
| Dental/toothache               | 132  |
| Diabetic problems              | 133  |
| Drowning                       | 134  |
| Ear/nose/throat problem        | 135  |
| Eye problem                    | 136  |
| Flank pain                     | 137  |
| Fluid/nutrition                | 138  |

| F-Z                           | Code |
|-------------------------------|------|
| Foreign body                  | 139  |
| Follow up                     | 140  |
| Gastrointestinal bleeding     | 141  |
| Gunshot wound                 | 142  |
| Gynecological problem         | 143  |
| Hemorrhage                    | 144  |
| Hypertension                  | 145  |
| Hyperthermia-Environmental    | 146  |
| Hypothermia-Environmental     | 147  |
| Industrial/machinery accident | 148  |
| Inhalation (smoke)            | 149  |
| Infection                     | 150  |
| Joint pain                    | 151  |
| Land mine injury              | 152  |
| Medication refill             | 153  |
| Neck pain                     | 154  |
| Needlestick                   | 155  |
| Neurological complaint        | 156  |
| Obstretical problem           | 157  |
| Other                         | 158  |
| Overdose (intentional)        | 159  |
| Peripheral vascular pain      | 160  |
| Pelvic pain                   | 161  |
| Procedure                     | 162  |
| Psychiatric/social problems   | 163  |
| Rape                          | 164  |
| Rash                          | 165  |
| Scrotal Pain/Male GU          | 166  |
| Shock                         | 167  |
| Stabbing                      | 168  |
| Sting                         | 169  |
| Stroke/CVA                    | 170  |
| Substance abuse               | 171  |
| Syncope/fainting              | 172  |
| Traffic injury-inside vehicle | 173  |
| Traffic injury-pedestrian     | 174  |
| Unconsciousness               | 175  |
| Unknown problem/Man down      | 176  |
| Weakness                      | 177  |
