# Supplementary material for: Characteristics and outcomes of pediatric patients presenting at Cambodian referral hospitals without appointments: an observational study
Source: Springer Nature journal article supplement (doi:10.1186/s12245-018-0172-0), 2018-03-13
Supplement: MOESM2 [file 15531372]

**Table S1 Criteria for abnormal vital signs**

| <b>Age</b>         |                    | <b>Pulse</b>       |                    | <b>SBP</b>         |                    | <b>RR</b>          |                    |
|--------------------|--------------------|--------------------|--------------------|--------------------|--------------------|--------------------|--------------------|
| <b>lower limit</b> | <b>upper limit</b> | <b>lower limit</b> | <b>upper limit</b> | <b>lower limit</b> | <b>upper limit</b> | <b>lower limit</b> | <b>upper limit</b> |
| 0 mos              | <3 mos             | <=100              | >=150              | <=65               | >=85               | <=35               | >=55               |
| 3 mos              | <6 mos             | <=90               | >=120              | <=70               | >=90               | <=30               | >=45               |
| 6 mos              | <12 mos            | <=80               | >=120              | <=80               | >=100              | <=25               | >=40               |
| 12 mos             | < 2 yrs            | <=70               | >=110              | <=80               | >=105              | <=20               | >=30               |
| 2 yrs              | <5 yrs             | <=60               | >=140              | <=80               | >=110              | <=20               | >=34               |
| 5 yrs              | <10 ys             | <=60               | >=140              | <=80               | >=110              | <=18               | >=30               |
| 10 yrs             | <13 yrs            | <=50               | >=100              | <=90               | >=110              | <=18               | >=30               |
| 13 yrs             | up                 | <=50               | >=100              | <=90               | >=140              | <=10               | >=28               |

SBP = systolic blood pressure; RR = respiratory rate

Criteria for abnormal vital signs were selected by the authors based on multiple references, including:

Kliegman RM, Stanton BF, St. Geme J, Schor NF, Behrman RE. *Nelson textbook of pediatrics*, 20th ed. Philadelphia, PA: Elsevier; 2016.

Mahadevan SV, Garmel GM. *An introduction to clinical emergency medicine*. New York: Cambridge University Press; 2005.

Los Angeles County Department of Public Health. *PEDIATRIC SURGE POCKET GUIDE*.

<http://publichealth.lacounty.gov/eprp/docs/emergency%20plans/pediatric%20surge%20pocket%20guide.pdf> (accessed 04 March 2016).
